# Supplementary material for: Retrospective Attention Gates Discrete Conscious Access to Past Sensory Stimuli
Source: PubMed Central journal article supplement (PMC4749386; doi:10.1371/journal.pone.0148504), 2016-02-10
Supplement: pone.0148504.s002.pdf [file pone.0148504.s002.pdf]

## Supplementary Information

### Formulas

1. Bessel equation of order  $\nu$ :

$$I_{\nu}(z) = \left(\frac{z}{2}\right)^{\nu} \sum_{(k=0)}^{\infty} \frac{\left(\frac{z^2}{4}\right)^k}{k! \Gamma(\nu + k + 1)}$$

where  $\Gamma$  is the gamma function.

2. The conversion of the precision parameter  $\kappa$  to standard deviation (SD) follow the equation:

$$SD = \sqrt{-2 \cdot \ln \frac{I_1(\kappa)}{I_0(\kappa)}}$$
